# Supplementary material for: Circular RNA circ_0000515 adsorbs miR-542-3p to accelerate bladder cancer progression via up-regulating ILK expression
Source: publisher site journal article supplement (doi:10.18632/aging.203818), 2022-01-14
Supplement: Supplementary file [file aging-v14i1-203818-supplementary-material-SD1.pdf]

**SUPPLEMENTARY FIGURE**

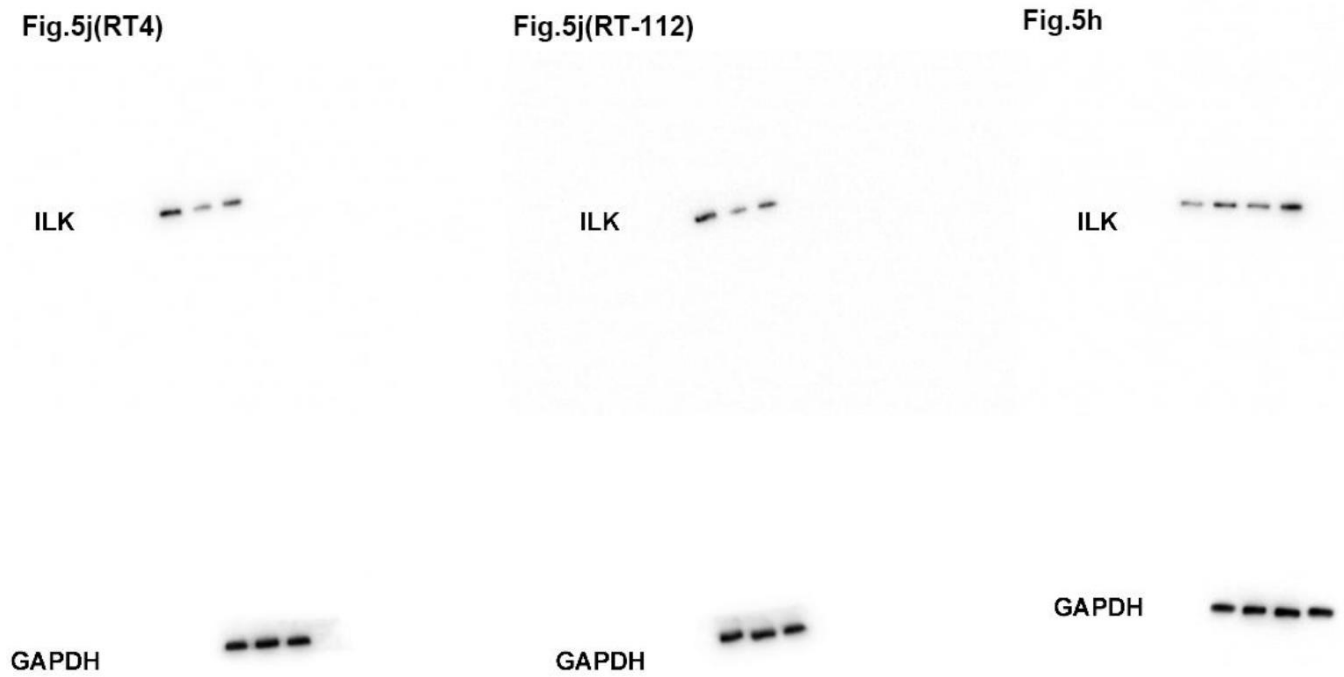

**Supplementary Figure 1.** The whole uncropped images of the original PVDF membranes in Figure 5.
